# Supplementary material
Source: PubMed Central journal article supplement (PMC4480344)
Supplement: NIHMS687656-supplement-1.pdf [file NIHMS687656-supplement-1.pdf]

**day 9**

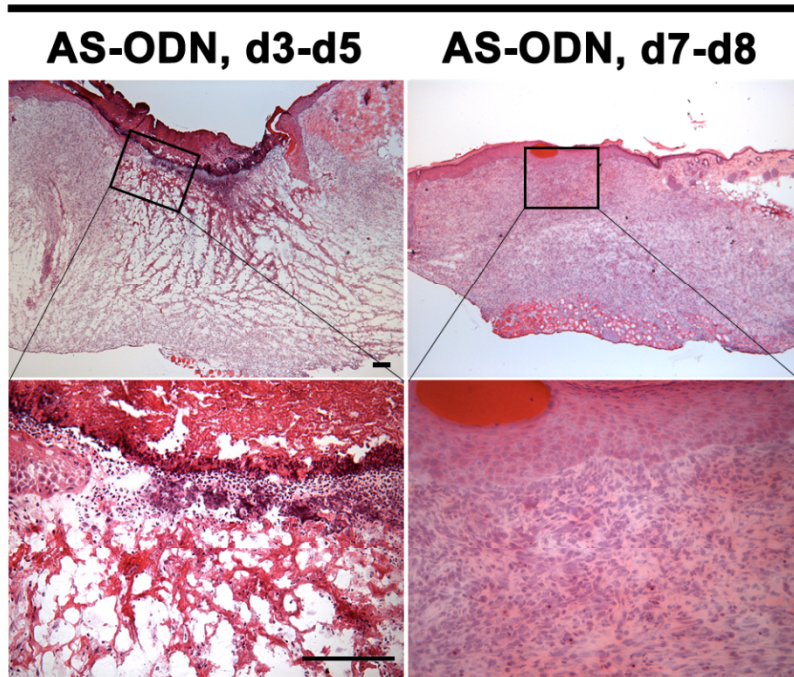

**Supplementary Figure S1. Targeting early *Ccn1* expression in wound healing results in persistent inflammatory cells infiltration.** Mouse excisional wounds were treated with *Ccn1* antisense oligonucleotides (AS-ODN) either from days 3-5 to target early expression or days 7-8 to target late expression, and day 9 wounds were sectioned and stained with H&E (Bars=100 $\mu$ m). Boxed areas were enlarged with higher magnification. Persistent inflammatory cells infiltration and impaired granulation tissue formation were observed only in wounds with knockdown of early *Ccn1* expression

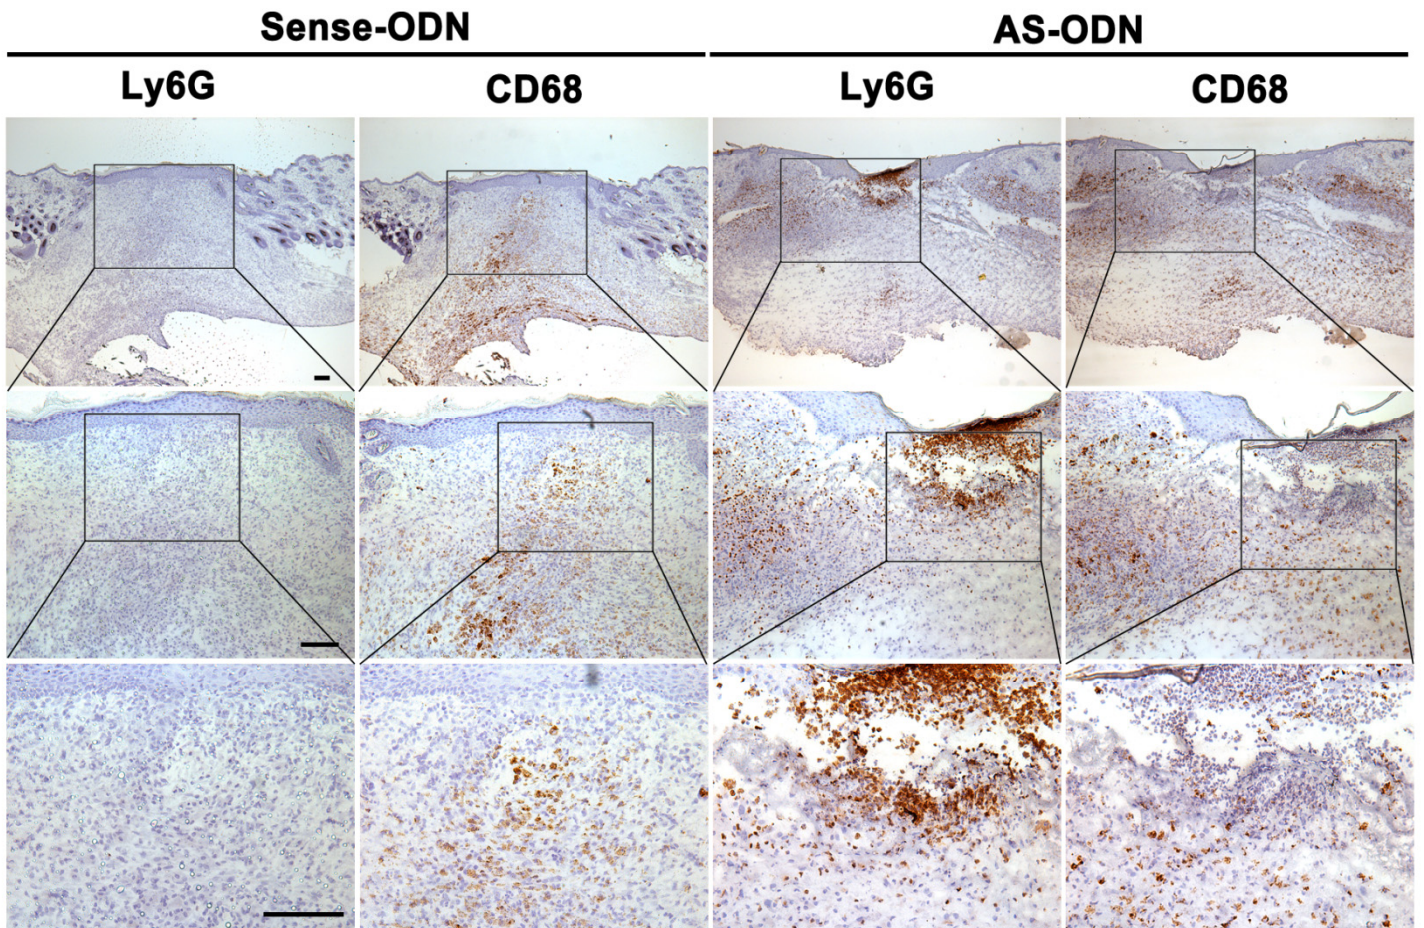

**Supplementary Figure S2. AS-ODN-treated wounds exhibit accumulation of neutrophils.** Both sense-ODN and AS-ODN-treated wounds of C57BL/6 mice (day 9) were stained with antibodies against Ly6G (neutrophils) or CD68 (macrophages). Boxed areas were enlarged with higher magnification. Bars=100 $\mu$ m



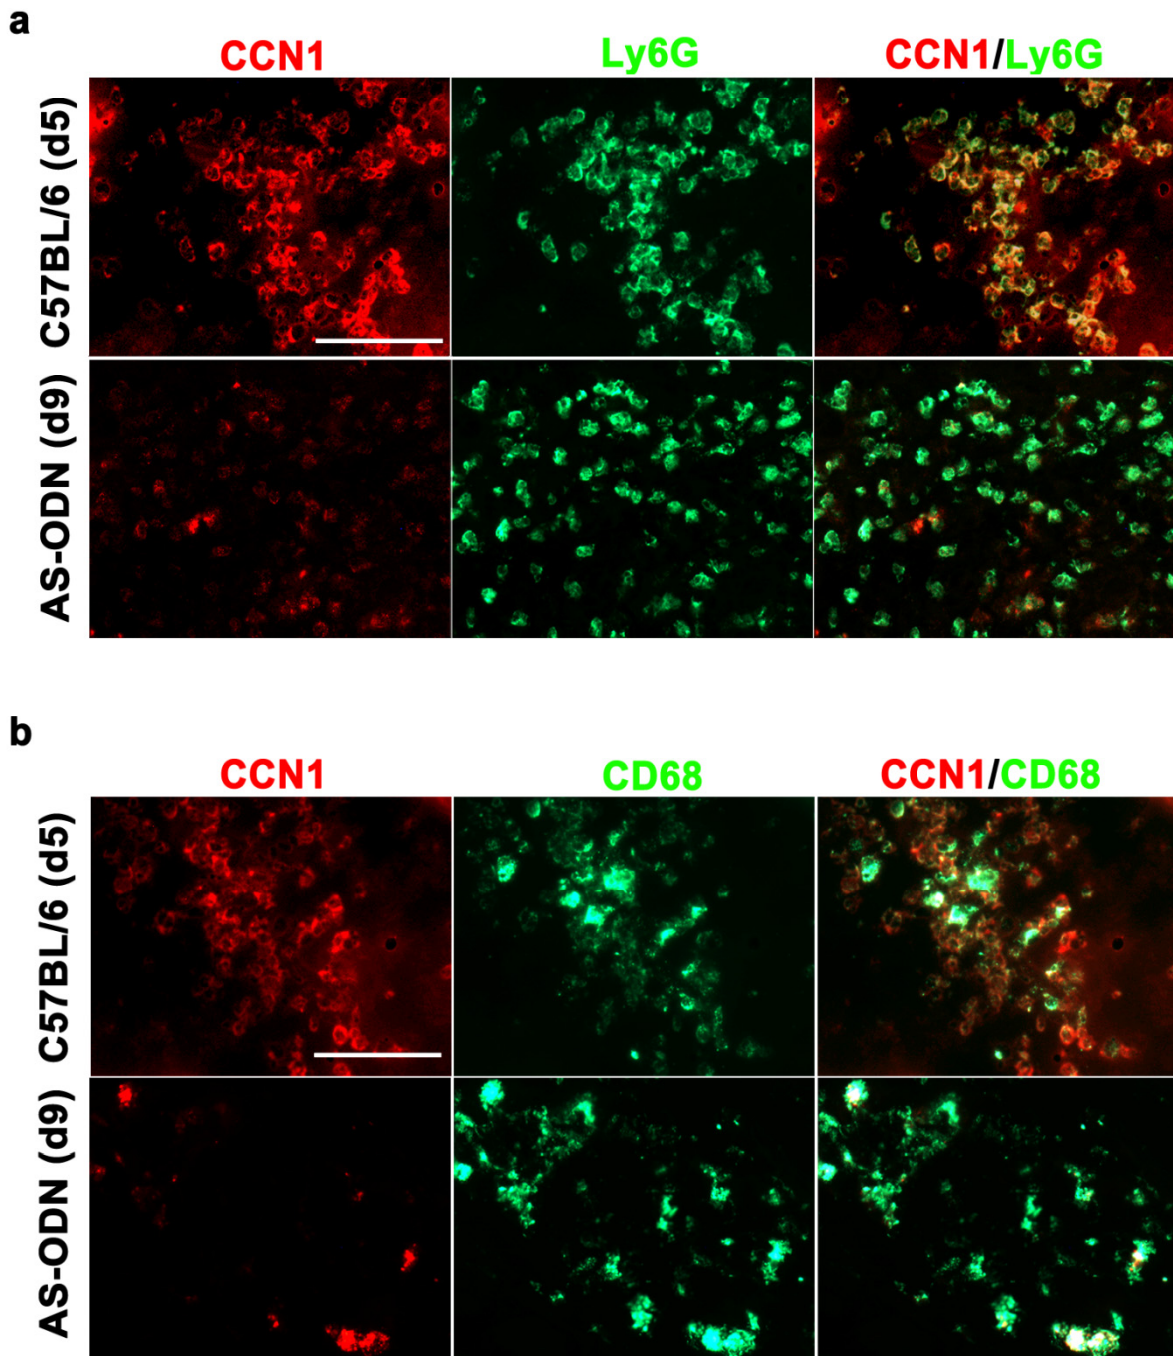

**Supplementary Figure S3. CCN1 expression and knockdown in both neutrophils and macrophages.** Cutaneous wounds from untreated C57BL/6 mice (day 5) or mice with AS-ODN treatment (day 9) were visualized by double-immunofluorescence staining using antibodies against CCN1 (red) and Ly6G (green, panel a) or CD68 (green, panel b). (Bar=50  $\mu$ m).

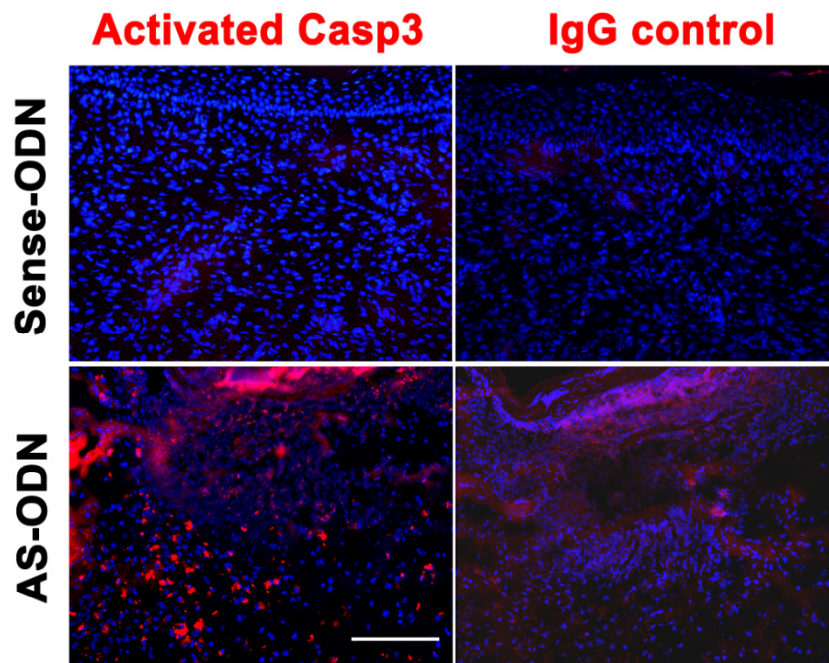

**Supplementary Figure S4. Increased detection of apoptotic cells in AS-ODN-treated wounds.** Wound tissue sections (day 9) from mice treated with AS-ODN or sense-ODN from day3 to day7 were stained with anti-active caspase3 (red) and counterstained with DAPI (blue). Diffused staining seen on the top of AS-ODN-treated wound is the scab area, as these wounds have not re-epithelialized (see Fig.1i). Isotype IgG was used as a control. Bar=100 $\mu$ m.

**a**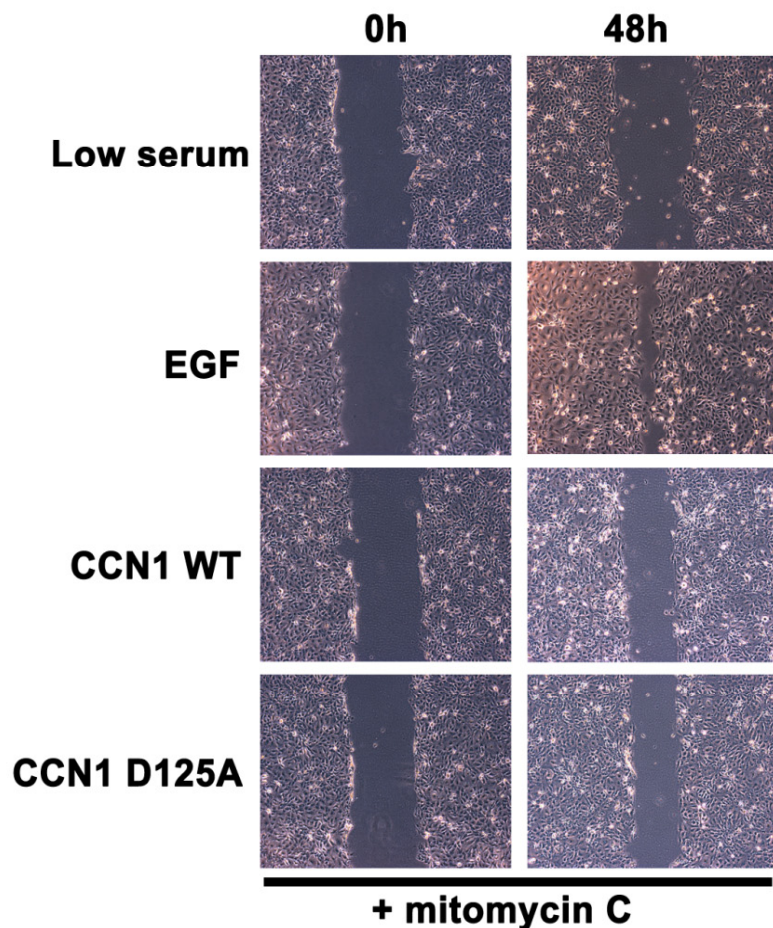**b**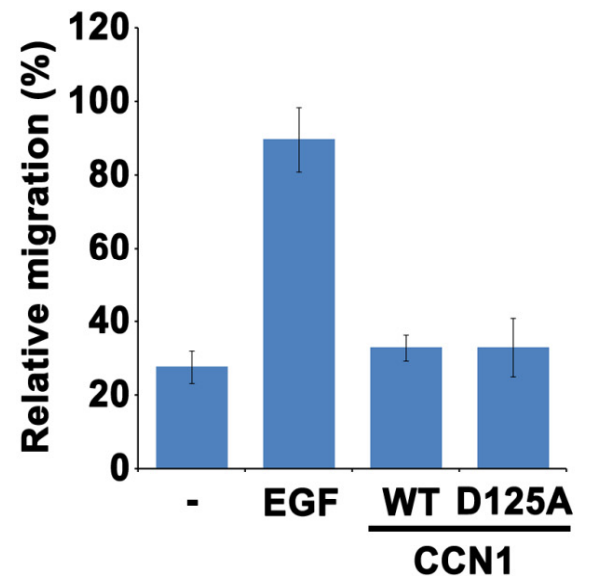

**Supplementary Figure S5. CCN1 shows no effect on keratinocytes migration. (a and b)** Human immortalized keratinocytes (HaCaT) were plated on collagen-coated plate and serum-starved for 48h. Cells were pre-treated with mitomycin C (10  $\mu\text{g}$  per ml), followed by the treatment of recombinant CCN1 proteins (WT and D125A; 2  $\mu\text{g}$  per ml each) or rhEGF (10 ng per ml). Cell migration was analyzed after 48 h. Representative images were shown (a) and cell migration was quantified using ImageJ software (n=3 per treatment). (b) Data represent means  $\pm$  standard deviations. Experiments were conducted in triplicate.



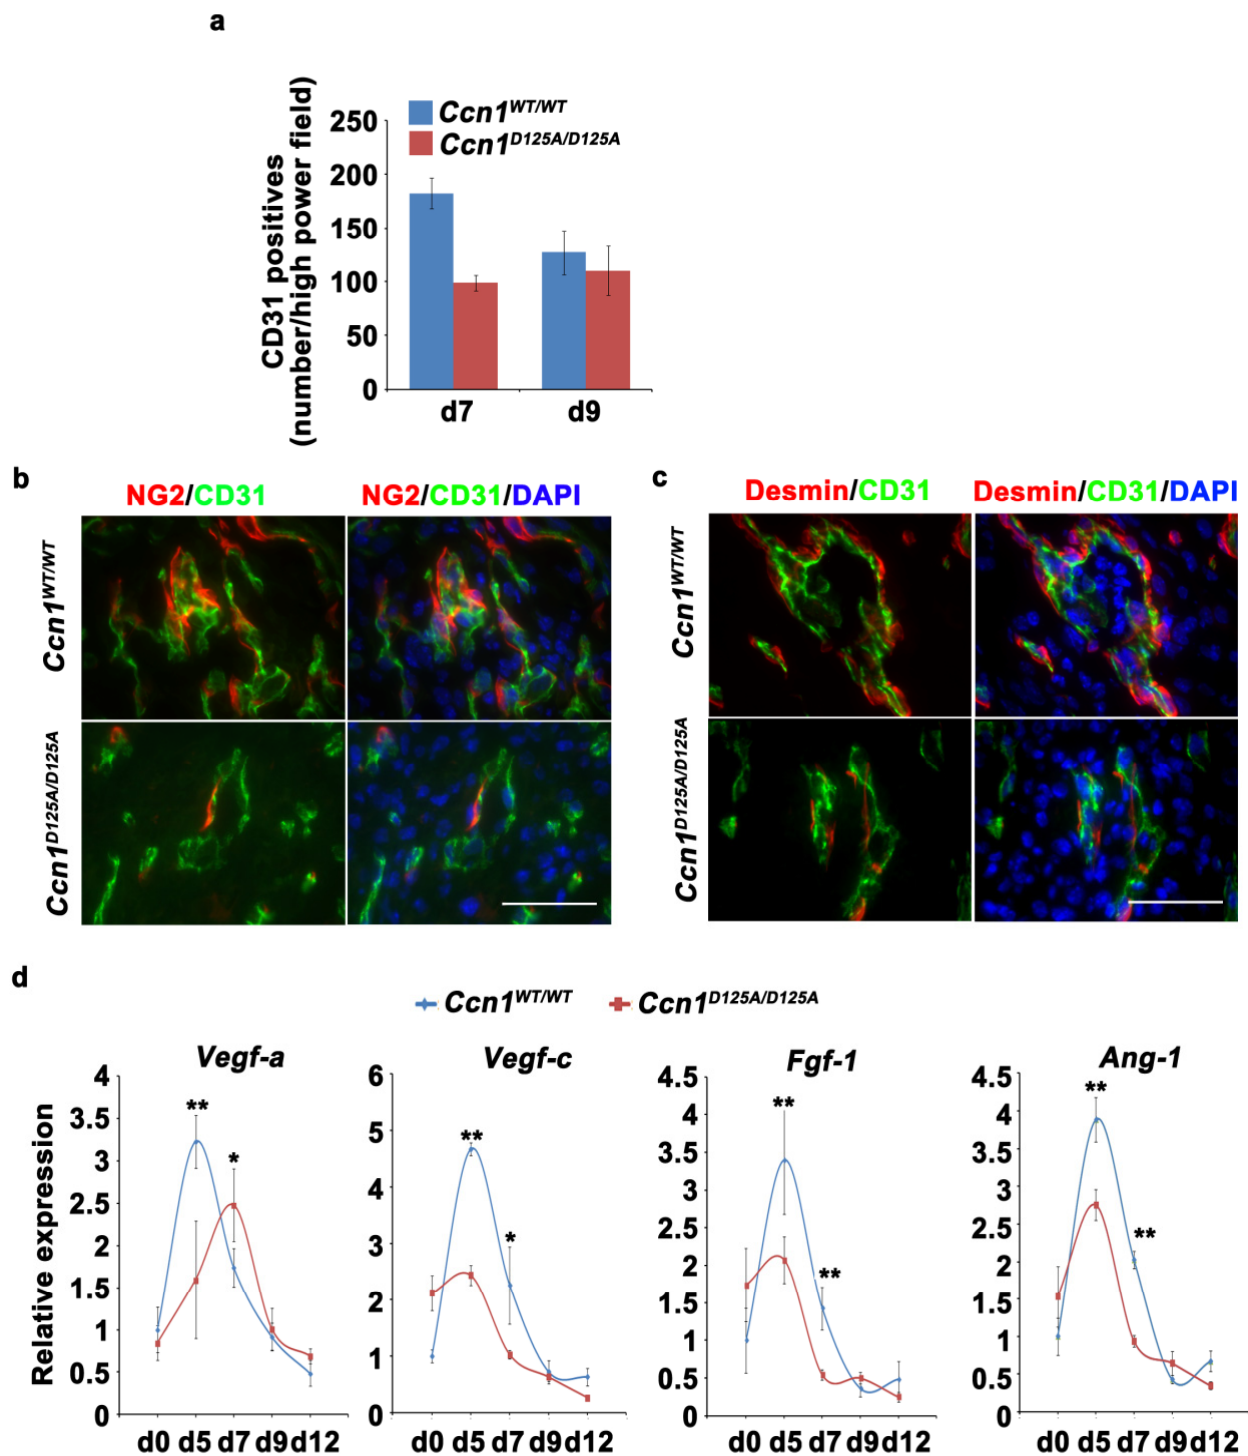

**Supplementary Figure S6. *Ccn1*<sup>D125A/D125A</sup> mice exhibit impaired angiogenesis in wound healing.** (a) Wound sections were stained for CD31, and the number of CD31 positive endothelial cells were counted in randomly selected high-powered fields (n=6 per genotype). (b) Double immunofluorescence staining for CD31 (endothelial cells; green) and NG2 (pericytes; red) or (c) CD31 and desmin (pericytes; red) was performed to visualize pericyte recruitment by blood vessels. Extensive association and juxtaposition of pericytes with endothelial cells was observed in *WT* wounds but not in wounds of *Ccn1*<sup>D125A/D125A</sup> mice. Bar=40µm. (d) Expression of angiogenesis-related genes (*Vegf-a*, *Vegf-c*, *Fgf-1*, and *Ang-1*) in *WT* and *Ccn1*<sup>D125A/D125A</sup> wounds was analyzed using qRT-PCR (n=4 per genotype). Statistical analyses were conducted using one-sided two-sample *t*-tests (qRT-PCR). \**p*<0.03, \*\**p*<0.006. Data represent means ± standard deviation. All experiments were conducted in triplicates.

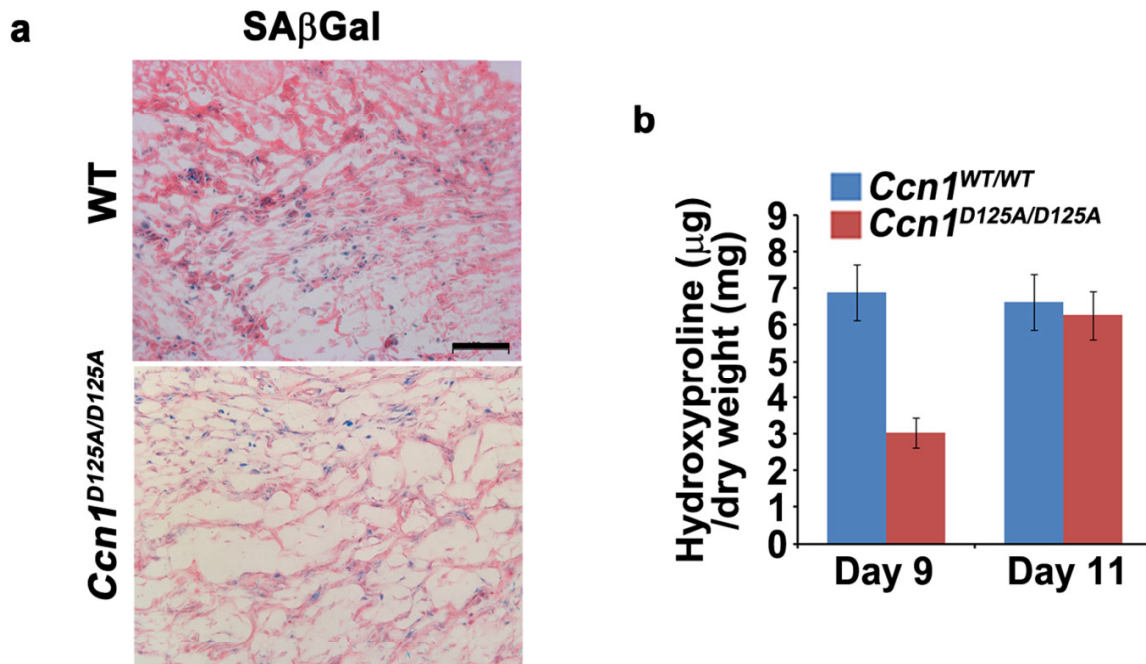

**Supplementary Figure S7. Cellular senescence occurs during wound healing in *Ccn1*<sup>D125A/D125A</sup> mice.** (a). Wound tissues from either *WT* or *Ccn1*<sup>D125A/D125A</sup> mice (day 9) were evaluated for senescence by SA- $\beta$ -gal staining. Both genotypes showed comparable staining for the senescent cell marker. Bar=100  $\mu\text{m}$ . (b) Wound tissues were harvested at indicated days and hydroxyproline contents were measured to evaluate collagen deposition (n=4 per genotype). Wounds of *Ccn1*<sup>D125A/D125A</sup> mice initially showed lower levels of collagens but later held similar levels to *WT* wounds, consistent with delayed healing. Data represent means  $\pm$  standard deviation. Experiments were performed in triplicate.

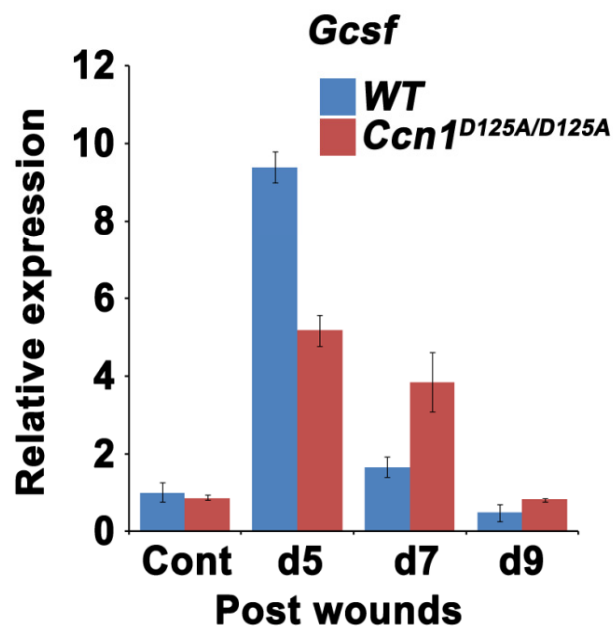

**Supplementary Figure S8. Analysis of *Gcsf* expression during wound healing.** Wound tissues from either *WT* or *Ccn1*<sup>D125A/D125A</sup> mice were analyzed for *Gcsf* expression using qRT-PCR (n=4 for post wounds day per each genotype). Data represent means  $\pm$  standard deviation. Experiments were performed in triplicate.



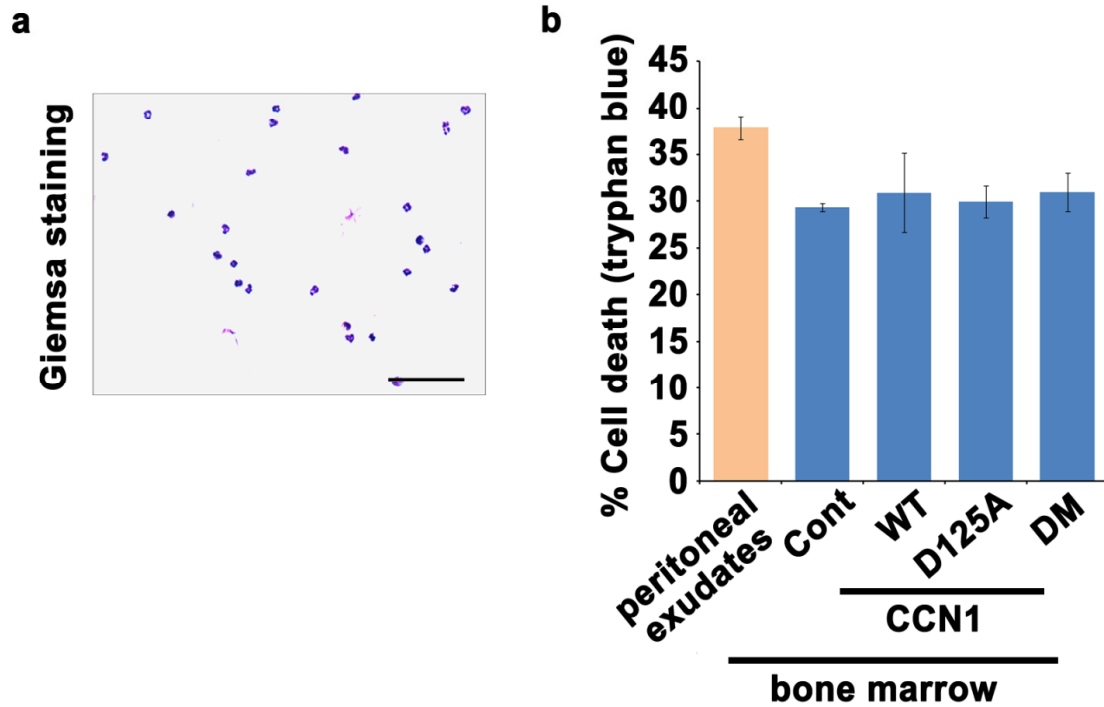

**Supplementary Figure S9. Characterization of neutrophils isolated from bone marrow.** (a) Neutrophils were isolated from bone marrow of either *WT* or *Ccn1<sup>D125A/D125A</sup>* mice using Percoll density gradient centrifugation and cellular film was created on the slide, and the purity of the neutrophil preparation was evaluated by Giemsa staining. Representative image from *WT* neutrophils was shown (Bar=40 $\mu$ m). (b) Isolated neutrophils were incubated with CCN1 proteins (WT, D125A, and DM mutants) for 1 day and cell death was measured using trypan blue exclusion assay (n=3 per treatment). Neither WT nor mutant CCN1 proteins showed any effect on neutrophil cell death. Neutrophils from the peritoneal cavity were used as a control. Data represent means  $\pm$  standard deviation. Experiments were conducted in triplicates.

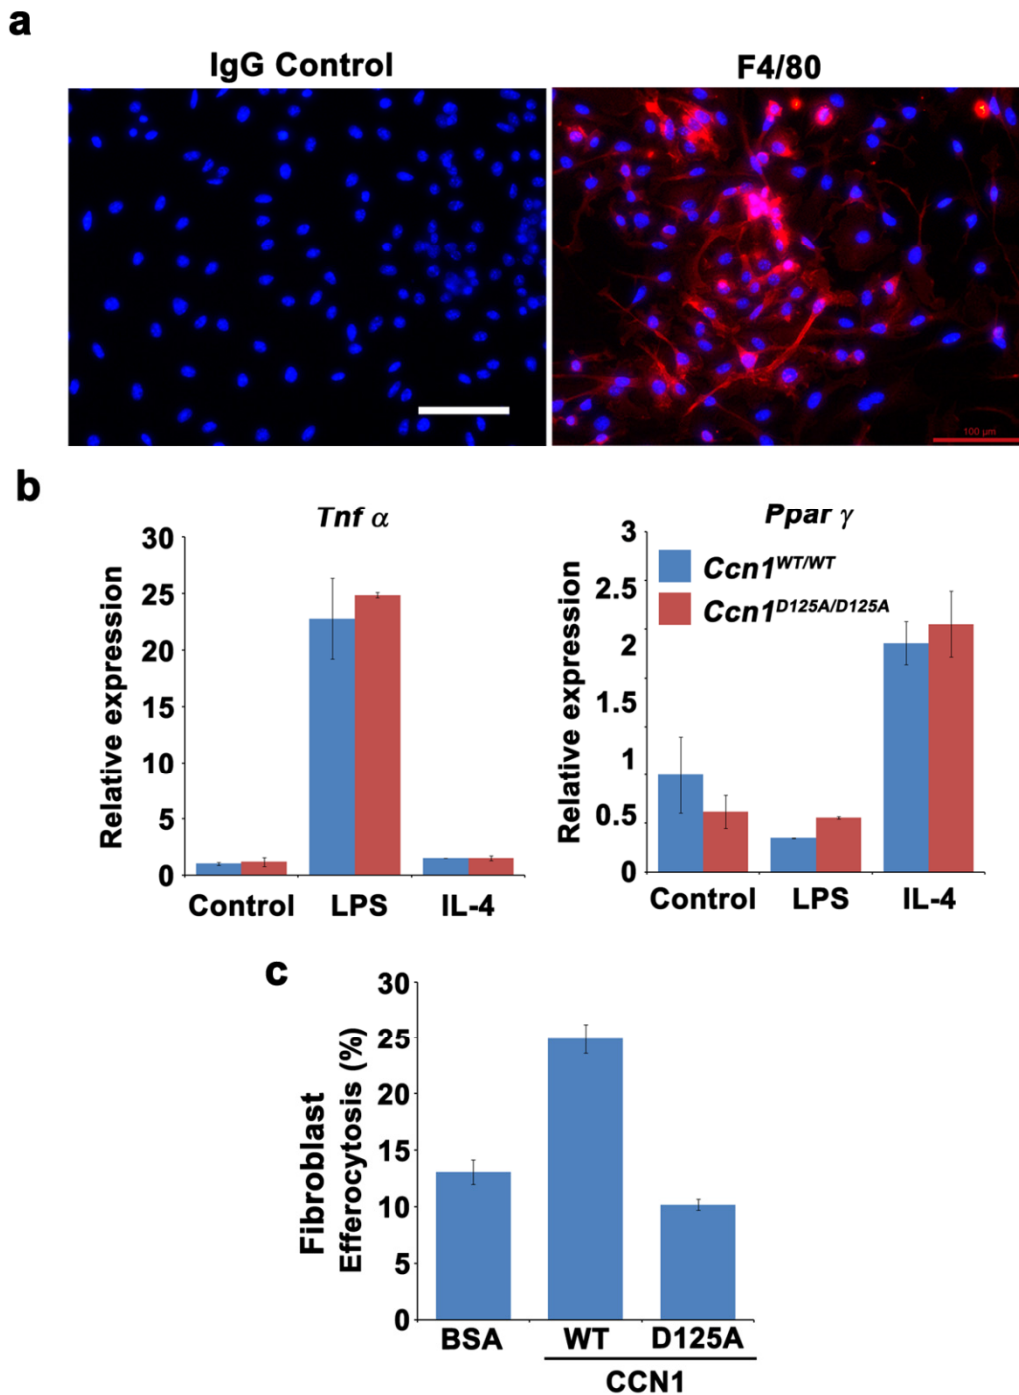

**Supplementary Figure S10. Characterization of bone marrow-derived macrophages.** (a) Bone marrow-derived monocytes were differentiated into macrophages and stained with anti-F4/80 (red), and counterstained with DAPI (blue). Bar=100mm. (b) Isolated macrophages from either *WT* or *Ccn1*<sup>D125A/D125A</sup> mice were treated with mLPS (50 ng per ml) or mL-4 (20 ng per ml) to evaluate their responses to M1 or M2 activation, as monitored by expression of *Tnfα* or *Pparγ*, respectively (n=3). Macrophages from *WT* or *Ccn1*<sup>D125A/D125A</sup> mice responded similarly to stimulation by mLPS or mL-4. (c) Bone marrow-derived macrophages were examined for efferocytosis of apoptotic fibroblasts. Cultured human skin fibroblasts (1077SK) were induced to apoptosis using staurosporine (1 μM; 16h). Apoptotic cells were pre- incubated with WT and D125A CCN1 proteins (2 μg per ml) for 1 h and co-incubated with bone marrow-derived macrophages (*WT*) for additional 1 h. Efferocytosis was measured using fluorescence microscopy (n=3). Data represent means ± standard deviation. All experiments were performed in triplicate.

**Fig1b**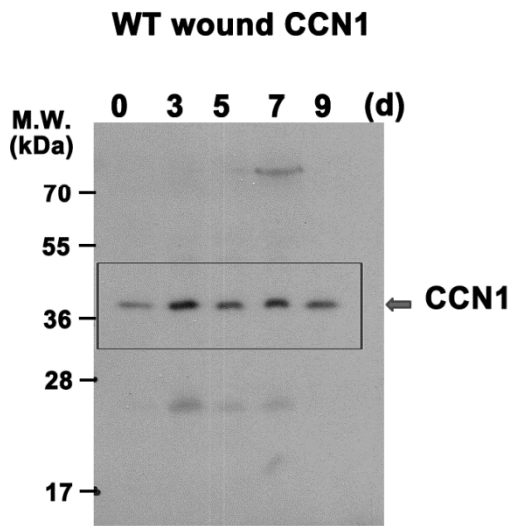**Fig8g**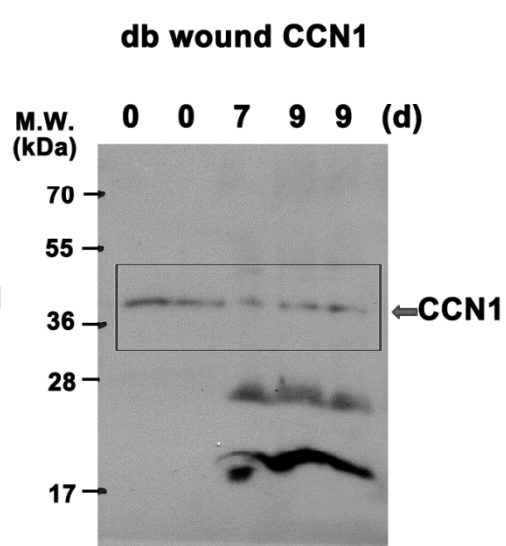**Fig1b**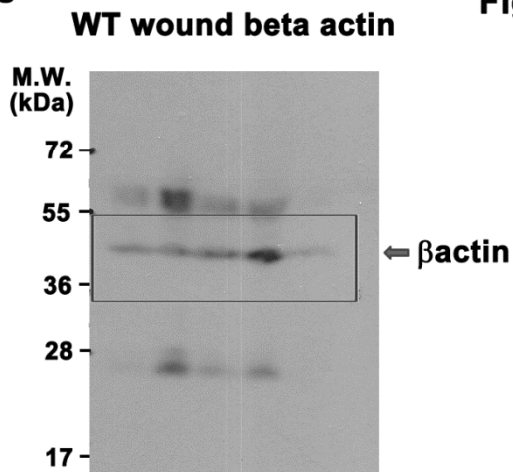**Fig8g**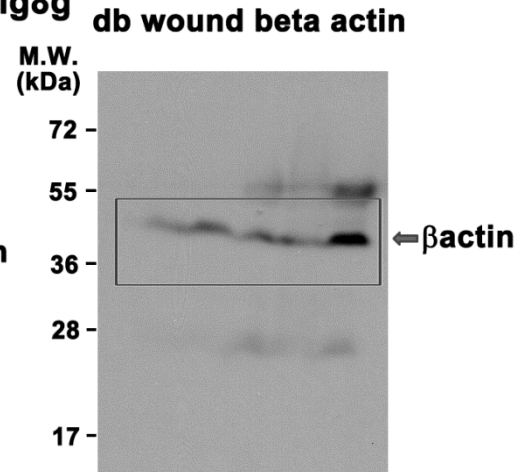**Fig6c**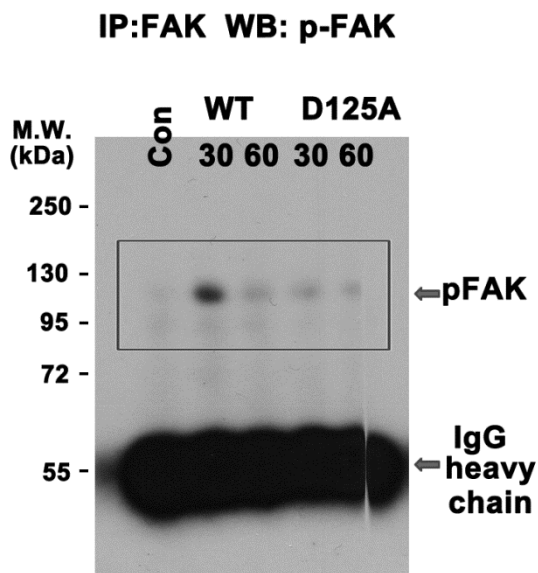**Fig6c**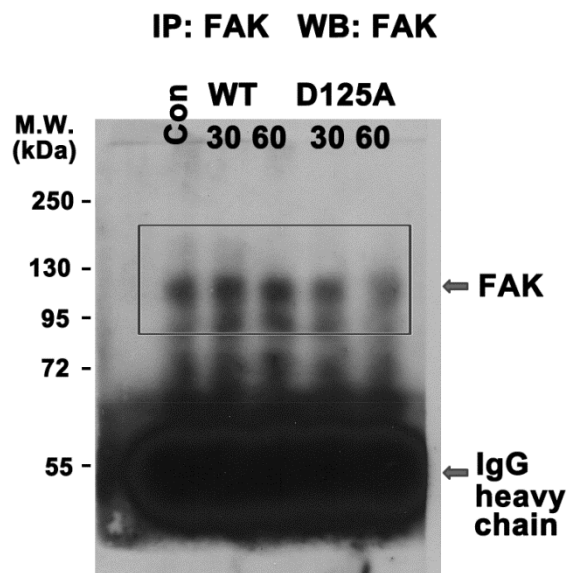



**Fig6a**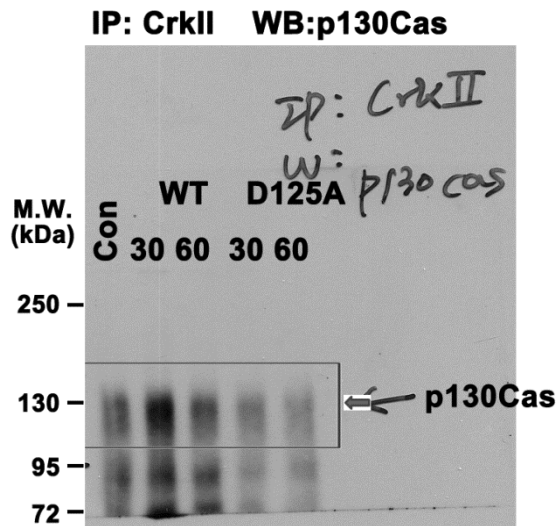**Fig6b**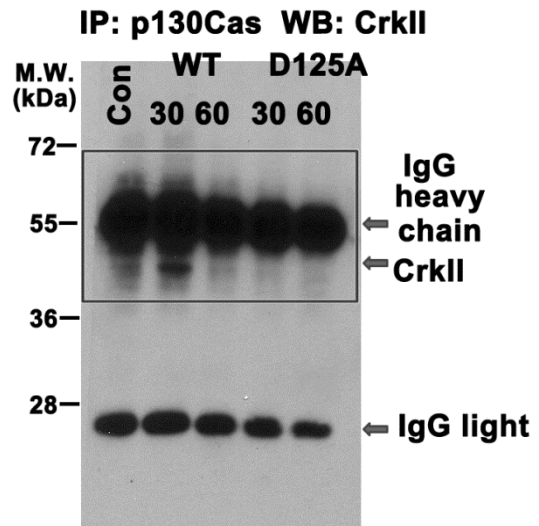**Fig6a**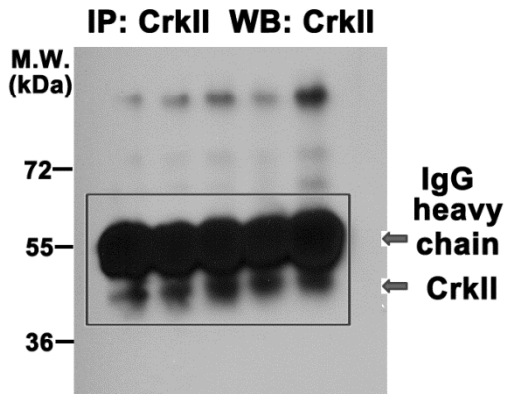**Fig6b**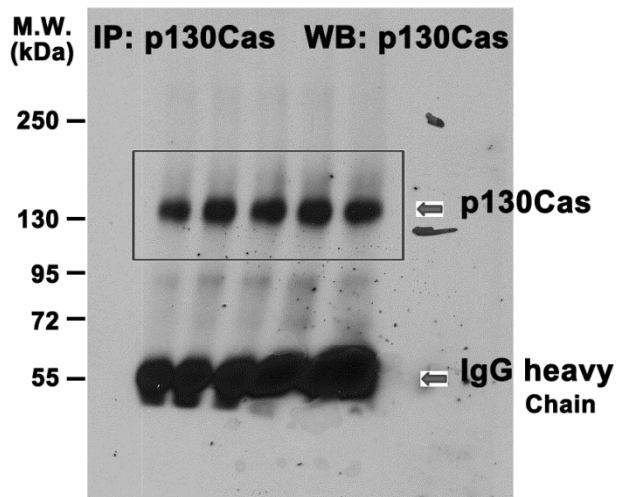**Fig6d**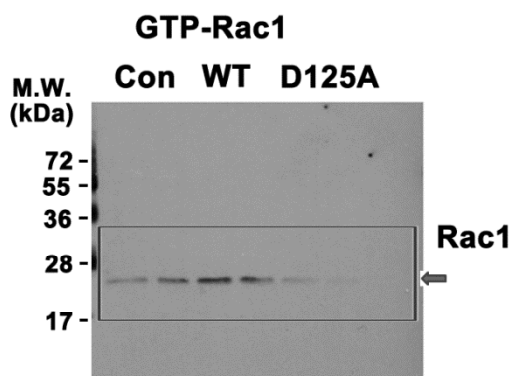**Fig6d**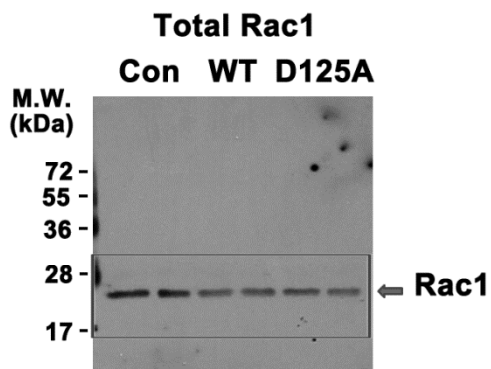

**Supplementary Table.1 Primer sequences for qRT-PCR**

| Gene                 |         | Sequence (5'→3')           |
|----------------------|---------|----------------------------|
| <i>Ccn1</i>          | forward | CCAGTGTACAGCAGCCTAAA       |
|                      | reverse | CTGGAGCATCCTGCATAAGTAA     |
| <i>Tnfa</i>          | forward | CATCTTCTCAAATTCGAGTGACAA   |
|                      | reverse | TGGGAGTAGACAAGGTACAACCC    |
| <i>Il1b</i>          | forward | CAACCAACAAGTGATATTCTCCATG  |
|                      | reverse | GATCCACACTCTCCAGCTGCA      |
| <i>Cxcl1</i>         | forward | CGAAGTCATAGCCACACTCAA      |
|                      | reverse | GAGCAGTCTGTCTTCTTTCTCC     |
| <i>Cxcl5</i>         | forward | TGAACTCCCTGCTTTGATGAG      |
|                      | reverse | CCGATAGTGTGACAGATAGGAAAG   |
| <i>Cxcr2</i>         | forward | CCTCACACAGGAACATAGCATAG    |
|                      | reverse | GAACTTCGGACCTTTGGAAGA      |
| <i>Ccl2</i>          | forward | CTCGGACTGTGATGCCTTAAT      |
|                      | reverse | TGGATCCACACCTTGCATTTA      |
| <i>Gcsf</i>          | forward | CATTCTCTCCACTTCCGAGTTT     |
|                      | reverse | GGTATTTACCCATCTCCTTCCC     |
| <i>Vegfa</i>         | forward | TCACCAAAGCCAGCACATAGGAGA   |
|                      | reverse | TTTCTCCGCTCTGAACAAGGCTCA   |
| <i>Vegfc</i>         | forward | TTTGGAGCAGCCACAAACACCTTC   |
|                      | reverse | TGAGGTAACCTGTGCTGGTGTTC    |
| <i>Fgf1</i>          | forward | AGTGAAGCATGGTTTCAAGGCACC   |
|                      | reverse | TTCTAATTTGCTGGGCACTTGGGC   |
| <i>angiopoetin1</i>  | forward | GCGCTGGCAGTACAATGACAGTTTCA |
|                      | reverse | CATTGCCCATGTTGAATCCGGT     |
| <i>cyclophilin E</i> | forward | TTCACAAACCACAATGGCACAGGG   |
|                      | reverse | TGCCGTCCAGCCAATCTGTCTTAT   |
